# Supplementary material for: Digital marketing of formula and baby food negatively influences breast feeding and complementary feeding: a cross-sectional study and video recording of parental exposure in Mexico
Source: HighWire-hosted journal article supplement (doi:10.1136/bmjgh-2022-009904), 2022-11-01
Supplement: bmjgh-2022-009904supp001_data_supplement.pdf [file bmjgh-2022-009904supp001_data_supplement.pdf]

## Supplementary material

**Title:** Digital marketing of formula and baby food negatively influences breastfeeding and complementary feeding: a cross-sectional study and video recording of parental exposure in Mexico

**Authors:** Mishel Unar-Munguía<sup>1\*</sup>, Andrea Santos-Guzmán<sup>1</sup>, Pedro Javier Mota-Castillo<sup>1</sup>, Marena Ceballos-Rasgado<sup>2</sup>, Lizbeth Tolentino Mayo<sup>1</sup>, Matthias Sachse<sup>3</sup>, Fernanda Cobo Armijo<sup>3</sup>, Simón Barquera<sup>1</sup>, Anabelle Bonvecchio Arenas<sup>1</sup>

**Breastfeeding and child feeding practices.** Parents were asked about their youngest child's consumption of the following list of foods, the day previous to the interview.

Supplementary Table 1. Foods and beverages were included in the questionnaire on feeding practices in children under two years of age.

| Formulas                                                                     |
|------------------------------------------------------------------------------|
| Infant formula (stage 1) (0-6 months)                                        |
| Follow-on formula (stage 2) (6-12 months)                                    |
| Growing-up milk (stage 3) (+12 months)                                       |
| Special formula (comfort, to prevent colic or constipation, with probiotics) |
| Hypoallergenic formula (hydrolyzed)                                          |
| Lactose-free formula                                                         |
| Fortified formula (DHA, HMO, iron, etc)                                      |
| Other milk                                                                   |
| Raw milk (cow, goat, etc)                                                    |
| Liquid or powdered pasteurized milk (cow, goat, etc)                         |
| Licons milk (liquid or powdered)                                             |
| Flavored milk (chocolate, vanilla, other)                                    |
| Evaporated milk                                                              |
| Soy, oat, almond, or other non-dairy milk                                    |
| Other                                                                        |
| Liquids/beverages                                                            |
| Plain water                                                                  |
| Sodas                                                                        |
| Natural juices (fruits/vegetables)                                           |
| Packaged juices                                                              |
| Coffee                                                                       |
| Tea                                                                          |

|                                                                                                             |
|-------------------------------------------------------------------------------------------------------------|
| Atole                                                                                                       |
| Broths                                                                                                      |
| <b>Cereals and legumes</b>                                                                                  |
| Pasta                                                                                                       |
| Rice                                                                                                        |
| Tortillas or other food made with corn dough                                                                |
| Cereals not specific for baby (oat, amaranth, tapioca, quinoa, etc)                                         |
| Tubers (potatoes, cassava, sweet potato, etc)                                                               |
| Bread (sweet/salt)                                                                                          |
| Industrialized bread                                                                                        |
| Legumes (beans, lentils, broad beans, etc)                                                                  |
| <b>Fruits and vegetables (fresh, frozen, whole, chopped, or pureed homemade)</b>                            |
| Fruits (apple, orange, papaya, bannana, etc)                                                                |
| Vegetables (carrots, broccoli, green leafy, tomatoes, etc)                                                  |
| <b>Meats (whole, chopped, or pureed homemade)</b>                                                           |
| Beef and pork meat                                                                                          |
| Heart, liver, offal (kidney, sweetbreads)                                                                   |
| Chicken                                                                                                     |
| Fish (fresh or canned)                                                                                      |
| Ham or sausages or other cold cuts                                                                          |
| <b>Dairy and eggs</b>                                                                                       |
| Cheese                                                                                                      |
| Yakult o similar                                                                                            |
| Yogurt                                                                                                      |
| Danonino type                                                                                               |
| Eggs                                                                                                        |
| <b>Commercial foods and beverages for children under two years of age and other industrialized products</b> |
| Baby cereals (Nestum, Cerelac, other)                                                                       |
| Vegetable or fruit canned baby porridge (Gerber, Heinz, other)                                              |
| Meat canned baby porridge (Gerber, Heinz, other)                                                            |
| Packaged juices for baby                                                                                    |
| Bottled water for baby                                                                                      |
| Yogurt for baby                                                                                             |
| Cookies/snacks for baby                                                                                     |
| Organic packaged baby food                                                                                  |
| Supplements (Pediasure)                                                                                     |
| Breakfast cereals                                                                                           |
| Packaged chips, chips, cookies, candies, chocolates, or cupcakes                                            |

### *Selection of formula and baby food companies*

We obtained information from the leading formula and baby foods with the highest sales and consumption in the country. We analyzed the Euromonitor report on baby food sales in Mexico [1] and the National Health and Nutrition Survey (ENSANUT 2018-19) [2] and selected the 10 companies and their brands that met at least 2 of the 4 selection criteria: 1)

that they were identified as in the ENSANUT 2018-19 and/or Euromonitor, 2) >100,000 followers in their main social media and/or official website, and 3) they were among the best sellers in pharmacies/supermarkets online. Two additional companies were included due to their rising sales of baby food (Holle Organic and Heinz), although did not meet all the inclusion criteria. The 11 companies and their brands/products are presented in **Supplementary Table 2**.

Supplementary Table 2. Companies and brands of formulas and baby foods were included in the study of digital marketing in Mexico.

| Company              | Brand                                                                   |
|----------------------|-------------------------------------------------------------------------|
| Nestlé               | Nan<br>Nido<br>Good Care<br>Excella Gold<br>Gerber<br>Cerelac<br>Nestum |
| Mead Johnson         | Enfamil<br>Enfagrow<br>Nutramigen<br>Pregestimil                        |
| Abbott               | Similac<br>Pediasure                                                    |
| Nutricia/Danone      | Aptamil<br>Danonino<br>Danone                                           |
| Genomma Lab          | Novamil                                                                 |
| Alula-Sanulac /Wyeth | Progress Gold<br>SMA Gold<br>Promil Gold<br>Infacare                    |
| FriesmanCampi        | Frisolac<br>Friso                                                       |
| Siegfried Rhein      | Nutri Baby                                                              |
| Nucitec              | Alpha Pro                                                               |
| Holle baby food      | Holle Organic                                                           |
| Heinz                | Heinz baby club                                                         |

Source: Elaborated with information from Euromonitor, The National Health and Nutrition Survey 2018-19, social media, and official websites of companies, pharmacies, and supermarkets in Mexico. IYCF: Infant and young child feeding practices.

Supplementary Table 3. Breastfeeding and IYCF practices in children under two years of age, and motivation and purchase of formula and baby food in Mexico. Online survey (n=1,074).

| Outcome variables                                                                                                                    | %    |
|--------------------------------------------------------------------------------------------------------------------------------------|------|
| <i>Breastfeeding and child feeding practices</i>                                                                                     |      |
| <b>Exclusive breastfeeding (children under 6 month)</b>                                                                              |      |
| % de niños de 0-5 meses de edad que fueron alimentados exclusivamente con leche materna en el día anterior                           | 32.6 |
| <b>Mixed breastfeeding (children under 6 months)<sup>1</sup></b>                                                                     |      |
| % of children 0-5 months of age who were fed formula and/or animal milk in addition to human milk on the previous day                | 34.5 |
| <b>Continued breastfeeding (12-23 months)</b>                                                                                        |      |
| % of children 12-23 months of age who were breastfed on the previous day                                                             | 45.2 |
| <b>Consumption of sugary beverages (6-23 months)<sup>2</sup></b>                                                                     |      |
| % of children 6-23 months of age who consumed sugary beverages on the previous day                                                   | 42.6 |
| <b>Consumption of unhealthy foods (6-23 months)<sup>3</sup></b>                                                                      |      |
| % of children 6-23 months of age who consumed unhealthy food on the previous day                                                     | 72.0 |
| <b>Consumption of formula (0-23 months)</b>                                                                                          |      |
| % of children 0-23 months of age who consumed formula milk on the previous day                                                       | 58.2 |
| <i>Purchase and purchase motivation of formula and baby food</i>                                                                     |      |
| <b>Formula and baby food purchases in physical or online stores</b>                                                                  |      |
| % of parents who made one or more purchases of formula and baby food in physical and/or online stores in the month before the survey | 87.2 |
| <b>Formula and baby food purchases in online stores</b>                                                                              |      |
| % of parents who made one or more online purchases of infant formula and/or baby food in the month before the survey                 | 17.7 |
| <b>Purchase motivation</b>                                                                                                           |      |
| % of parents who report purchasing infant formula and baby food due to:                                                              |      |
| Nutrient content                                                                                                                     | 44.6 |
| Ease of serving                                                                                                                      | 37.1 |
| Easy to preserve and store                                                                                                           | 22.5 |
| Product is organic                                                                                                                   | 21.8 |
| Effectiveness for baby satiety                                                                                                       | 19.7 |
| Relieves gastrointestinal symptoms                                                                                                   | 14.2 |
| <b>Purchase intention</b>                                                                                                            |      |
| % of parents who report having performed:                                                                                            |      |
| Formula and infant food online searches                                                                                              | 37.8 |
| Visits to infant formula and baby food companies' websites or social media                                                           | 34.4 |

IYCF: Infant and Young Child Feeding practices according to indicators recommended by the World Health Organization (WHO) and the United Nations Children's Fund (UNICEF) [3]. 1. Exclusive breastfeeding, human milk and plain water, human milk and animal milk/formula, human milk and non-dairy fluids, human milk, and complementary feeding products. 2. Commercially produced and packaged, sweetened beverages, including 100% fruit juice and fruit-flavored drinks to which sweeteners have been added. 3. Packaged foods for babies, and other industrialized products that can be high in sugar, salt, and/or unhealthy fats.

Supplementary Table 4. Association between exposure (self-report) of parents to digital marketing of formula and baby food, with the purchase of products and IYCF practices. Stratified by intention to exclusively breastfeed before birth.

| Exposure to digital marketing in the last month (self-report)                  | Purchase of formula and baby foods <sup>1</sup> | Changes in child's feeding <sup>1</sup> | Exclusive breastfeeding (0-5 months) <sup>2</sup> | Continued breastfeeding (12-23 months) <sup>3</sup> | Mixed breastfeeding (0-5 months) <sup>2</sup> | Consumption of processed food <sup>1</sup> | Consumption of formula <sup>1</sup> | Consumption of sugary drinks <sup>1</sup> |
|--------------------------------------------------------------------------------|-------------------------------------------------|-----------------------------------------|---------------------------------------------------|-----------------------------------------------------|-----------------------------------------------|--------------------------------------------|-------------------------------------|-------------------------------------------|
|                                                                                | OR<br>95% CI                                    | OR<br>95% CI                            | OR<br>95% CI                                      | OR<br>95% CI                                        | OR<br>95% CI                                  | OR<br>95% CI                               | OR<br>95% CI                        | OR<br>95% CI                              |
| <b>Frequency of digital marketing</b>                                          |                                                 |                                         |                                                   |                                                     |                                               |                                            |                                     |                                           |
| Never                                                                          | (ref)                                           | (ref)                                   | (ref)                                             | (ref)                                               | (ref)                                         | (ref)                                      | (ref)                               | (ref)                                     |
| 1-2 times/week                                                                 | 2.1 **<br>(1.1-4.5)                             | 0.86<br>(0.41-1.8)                      | 2.2<br>(0.60-7.8)                                 | 1.1<br>(0.47-2.3)                                   | 0.90<br>(0.20-4.1)                            | 1.1<br>(0.60-1.8)                          | 0.98<br>(0.57-1.7)                  | 0.12<br>(0.69-2.1)                        |
| 3-5 times/week                                                                 | 3.2 ***<br>(1.7-6.4)                            | 1.8<br>(0.9-3.6)                        | 0.74<br>(0.21-2.6)                                | 1.6<br>(0.74-3.5)                                   | 3.2<br>(0.77-13.5)                            | 1.2<br>(0.70-2.1)                          | 1.7*<br>(0.98-2.9)                  | 1.4<br>(0.80-2.4)                         |
| Daily                                                                          | 2.1*<br>(1.0-4.0)                               | 1.7<br>(0.13-1.47)                      | 2.3<br>(0.51-10.0)                                | 2.0<br>(0.82-1.6)                                   | 0.5<br>(0.08-3.5)                             | 0.85<br>(0.46-2.6)                         | 1.1<br>(0.57-1.9)                   | 0.93<br>(0.51-1.7)                        |
| <b>Tertiles of the number of advertised products observed in digital media</b> |                                                 |                                         |                                                   |                                                     |                                               |                                            |                                     |                                           |
| Tertile 1                                                                      | (ref)                                           | (ref)                                   | (ref)                                             | (ref)                                               | (ref)                                         | (ref)                                      | (ref)                               | (ref)                                     |
| Tertile 2                                                                      | 1.58<br>(0.94-2.6)                              | 1.95**<br>(1.1-3.6)                     | 0.52<br>(0.19-1.4)                                | 0.87<br>(0.48-1.59)                                 | 1.3<br>(0.39-4.3)                             | 1.4<br>(0.93-2.2)                          | 1.4<br>(0.96-2.2)                   | 1.39<br>(0.92-2.1)                        |
| Tertile 3                                                                      | 2.9***<br>(1.6-5.4)                             | 3.5***<br>(1.9-6.2)                     | 0.44<br>(0.16-1.22)                               | 1.4<br>(0.75-2.5)                                   | 5.4***<br>(1.4-20.9)                          | 1.5<br>(0.96-2.3)                          | 1.7***<br>(1.1-2.6)                 | 1.58**<br>(1.1-2.4)                       |

<sup>1</sup>n=576 <sup>2</sup>n=145 <sup>3</sup>n=292

\*p<0.10, \*\*p<0.05, \*\*\*p<0.001. OR: Odds ratio. Logistic regression model adjusted for: the age of the baby (in months), age and sex of the survey participant, socioeconomic level, number of children, marital status, occupation, schooling, and region of the country. 1. Parents who made a purchase of formula and/or baby foods defined as commercial foods for children under two years of age, in the last month in physical or online stores. 2. Mothers/fathers who reported changing the way they were feeding their youngest children influenced by advertisements for formula and baby food observed in digital media. 3. Infants 0-5 months of age who were fed exclusively with breast milk during the previous day. 4. Children 12-23 months of age who were fed breast milk during the previous day. 5. Exclusive breastfeeding, human milk and plain water, human milk and animal milk/formula, human milk and non-dairy fluids, human milk and complementary feeding products. 6. Children 0-23 months that consumed packaged foods for babies, and other industrialized products that can be high in sugar, salt, and/or unhealthy fats during the previous day. 7. Children 0-23 months that consumed infant formula (0-6 months), follow-on formula (6-12 months), growing-up milk (>12 months), and special formulas in the previous day. 8. Children 0-23 months that consumed commercially produced and packaged, sweetened beverages, including 100% fruit juice and fruit-flavored drinks to which sweeteners have been added during the previous day.

Supplementary Table 5. Association between exposure (self-report) of parents to digital marketing of formula and baby food, with the purchase of products and IYCF practices. Stratified by intention to mixed breastfeed or formula feed before birth.

| Exposure to digital marketing in the last month (self-report)                  | Purchase of formula and baby foods <sup>1</sup> | Changes in child's feeding <sup>1</sup> | Exclusive breastfeeding (0-5 months) <sup>2</sup> | Continued breastfeeding (12-23 months) <sup>3</sup> | Mixed breastfeeding (0-5 months) <sup>2</sup> | Consumption of processed food <sup>1</sup> | Consumption of formula <sup>1</sup> | Consumption of sugary drinks <sup>1</sup> |
|--------------------------------------------------------------------------------|-------------------------------------------------|-----------------------------------------|---------------------------------------------------|-----------------------------------------------------|-----------------------------------------------|--------------------------------------------|-------------------------------------|-------------------------------------------|
|                                                                                | OR<br>95% CI                                    | OR<br>95% CI                            | OR<br>95% CI                                      | OR<br>95% CI                                        | OR<br>95% CI                                  | OR<br>95% CI                               | OR<br>95% CI                        | OR<br>95% CI                              |
| <b>Frequency of digital marketing</b>                                          |                                                 |                                         |                                                   |                                                     |                                               |                                            |                                     |                                           |
| Never                                                                          | (ref)                                           | (ref)                                   | (ref)                                             | (ref)                                               | (ref)                                         | (ref)                                      | (ref)                               | (ref)                                     |
| 1-2 times/week                                                                 | 2.2<br>(0.71-6.7)                               | 1.6<br>(0.76-3.3)                       | 1.44<br>(0.22-9.3)                                | 0.99<br>(0.42-2.3)                                  | 1.15<br>(0.24-5.2)                            | 0.77<br>(0.42-1.4)                         | 0.72<br>(0.37-1.4)                  | 0.50<br>(0.23-1.1)                        |
| 3-5 times/week                                                                 | 1.8<br>(0.65-5.1)                               | 2.2**<br>(1.2-4.4)                      | 0.86<br>(0.12-6.0)                                | 1.6<br>(0.71-3.8)                                   | 2.0<br>(0.49-8.2)                             | 0.97<br>(0.53-1.8)                         | 1.2<br>(0.61-2.2)                   | 0.96<br>(0.44-2.0)                        |
| Daily                                                                          | 4.8<br>(0.95-25.1)                              | 2.3**<br>(1.1-5.1)                      | 0.66<br>(0.08-5.3)                                | 0.87<br>(0.25-3.0)                                  | 2.0<br>(0.48-8.4)                             | 0.63<br>(0.31-1.3)                         | 1.9<br>(0.76-1.1)                   | 1.5<br>(0.56-4.3)                         |
| <b>Tertiles of the number of advertised products observed in digital media</b> |                                                 |                                         |                                                   |                                                     |                                               |                                            |                                     |                                           |
| Tertile 1                                                                      | (ref)                                           | (ref)                                   | (ref)                                             | (ref)                                               | (ref)                                         | (ref)                                      | (ref)                               | (ref)                                     |
| Tertile 2                                                                      | 1.38<br>(0.57-3.33)                             | 1.56<br>(0.89-2.7)                      | 0.82<br>(0.19-3.5)                                | 1.38<br>(0.71-2.6)                                  | 0.97<br>(0.30-3.1)                            | 1.3<br>(0.93-2.2)                          | 0.85<br>(0.52-1.4)                  | 0.75<br>(0.43-1.3)                        |
| Tertile 3                                                                      | 1.79<br>(0.66-4.9)                              | 2.9***<br>(1.7-4.9)                     | 0.13**<br>(0.02-0.69)                             | 0.73<br>(0.35-1.5)                                  | 1.7<br>(0.63-4.6)                             | 1.5<br>(0.93-2.4)                          | 2.8***<br>(1.6-5.0)                 | 2.1**<br>(1.1-3.9)                        |

<sup>1</sup>n=498 <sup>2</sup>n=119 <sup>3</sup>n=243

\*p<0.10, \*\*p<0.05, \*\*\*p<0.001. OR: Odds ratio. Logistic regression model adjusted for: the age of the baby (in months), age and sex of the survey participant, socioeconomic level, number of children, marital status, occupation, schooling, and region of the country. 1. Parents who made a purchase of formula and/or baby foods defined as commercial foods for children under two years of age, in the last month in physical or online stores. 2. Mothers/fathers who reported changing the way they were feeding their youngest children influenced by advertisements for formula and baby food observed in digital media. 3. Infants 0-5 months of age who were fed exclusively with breast milk during the previous day. 4. Children 12-23 months of age who were fed breast milk during the previous day. 4. Exclusive breastfeeding, human milk and plain water, human milk and animal milk/formula, human milk and non-dairy fluids, human milk and complementary feeding products. 5. Children 0-23 months that consumed packaged foods for babies, and other industrialized products that can be high in sugar, salt, and/or unhealthy fats during the previous day. 6. Children 0-23 months that consumed infant formula (0-6 months), follow-on formula (6-12 months), growing-up milk (+12 months), and special formulas in the previous day. 7. Children 0-23 months that consumed commercially produced and packaged, sweetened beverages, including 100% fruit juice and fruit-flavored drinks to which sweeteners have been added during the previous day.

## References

- Government of Canada. Sector Trend Analysis – Baby food in Mexico. 2018.  
<https://www.agr.gc.ca/eng/international-trade/market-intelligence/reports/sector-trend-analysis-baby-food-in-mexico/?id=1528459672486> (accessed 7 Oct 2020).
- Shamah-Levy T, Vielma-Orozco E, Heredia-Hernández O, *et al.* *Encuesta Nacional de Salud y Nutrición 2018-19 Resultados nacionales*. 2020.
- World Health Organization and the United Nations Children's Fund (UNICEF).

*Indicators for assessing infant and young child feeding practices.* 2021.
